# Supplementary material for: Unusual seeding effect in the liquid-assisted high-pressure polymorphism of chlorpropamide
Source: Royal Society of Chemistry journal article supplement (doi:10.1039/c6ce00711b), 2016-01-01
Supplement: c6ce00711b2.pdf [file c6ce00711b2.pdf]

**Table S1. Summary on chlorpropamide polymorphs crystal data**

| Chlorpropamide polymorph                  | $\alpha^1$<br>(295 K,<br>0 GPa)                                                   | $\beta^2$<br>(295 K,<br>0 GPa)                                                    | $\gamma^3$<br>(295 K,<br>0 GPa)                                                   | $\delta^4$<br>(295 K,<br>0 GPa)                                                    | $\epsilon^4$<br>(250 K,<br>0 GPa)                                                   | $\epsilon^{11}$<br>(100 K,<br>0 GPa)                                                | $\alpha^{15}$<br>(293 K,<br>2.91 GPa)                                               | $\beta^{116}$<br>(200 K,<br>0 GPa)                                                  | $\beta^{116}$<br>(100 K,<br>0 GPa)                                                  |
|-------------------------------------------|-----------------------------------------------------------------------------------|-----------------------------------------------------------------------------------|-----------------------------------------------------------------------------------|------------------------------------------------------------------------------------|-------------------------------------------------------------------------------------|-------------------------------------------------------------------------------------|-------------------------------------------------------------------------------------|-------------------------------------------------------------------------------------|-------------------------------------------------------------------------------------|
| Space group                               | $P2_12_12_1$                                                                      | $Pbcn$                                                                            | $P2_1$                                                                            | $Pbca$                                                                             | $Pna2_1$                                                                            | $Pna2_1$                                                                            | $P2_111$                                                                            | $P2/c$                                                                              | $P2/n$                                                                              |
| Z                                         | 4                                                                                 | 8                                                                                 | 2                                                                                 | 8                                                                                  | 4                                                                                   | 4                                                                                   | 4                                                                                   | 8                                                                                   | 16                                                                                  |
| Z'                                        | 1                                                                                 | 1                                                                                 | 1                                                                                 | 1                                                                                  | 1                                                                                   | 1                                                                                   | 2                                                                                   | 2                                                                                   | 4                                                                                   |
| a, Å                                      | 26.673(6)                                                                         | 14.777(3)                                                                         | 6.126(2)                                                                          | 9.3198(4)                                                                          | 19.9121(10)                                                                         | 26.4353(19)                                                                         | 25.602(3)                                                                           | 14.5882(5)                                                                          | 28.4475(12)                                                                         |
| b, Å                                      | 5.2296(19)                                                                        | 9.316(4)                                                                          | 8.941(6)                                                                          | 10.3218(3)                                                                         | 7.3459(4)                                                                           | 5.1398(4)                                                                           | 4.6340(2)                                                                           | 9.2584(2)                                                                           | 9.2322(3)                                                                           |
| c, Å                                      | 9.088(2)                                                                          | 19.224(5)                                                                         | 12.020(4)                                                                         | 26.2663(10)                                                                        | 9.1384(4)                                                                           | 9.0845(6)                                                                           | 8.8525(4)                                                                           | 19.1532(6)                                                                          | 19.2298(7)                                                                          |
| $\beta$ , °                               | 90                                                                                | 90                                                                                | 99.68(3)                                                                          | 90                                                                                 | 90                                                                                  | 90                                                                                  | $\alpha = 99.109(4)$                                                                | 93.260(3)                                                                           | 95.562(4)                                                                           |
| V, Å <sup>3</sup>                         | 1267.6(6)                                                                         | 2646.4(14)                                                                        | 649.0(5)                                                                          | 2526.74(16)                                                                        | 1336.69(12)                                                                         | 1234.33(15)                                                                         | 1037.01(14)                                                                         | 2582.71(13)                                                                         | 5026.6(3)                                                                           |
| $\rho$ , g·cm <sup>-3</sup>               | 1.450                                                                             | 1.389                                                                             | 1.416                                                                             | 1.455                                                                              | 1.375                                                                               | 1.489                                                                               | 1.773                                                                               | 1.423                                                                               | 1.463                                                                               |
| Orientation of alkyl tail in the molecule | 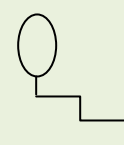 |  |  |  |  |  |  |  |  |
| H-bonded ribbon type                      | z                                                                                 | $\pi$                                                                             | z                                                                                 | z                                                                                  | z                                                                                   | z                                                                                   | z                                                                                   | $\pi$                                                                               | $\pi$                                                                               |

H-bonded ribbon types: z – 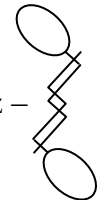 and  $\pi$  – . Polymorphs studied at low temperature indicated by blue, at high pressure – by red. Polymorphs discussed in the present contribution indicated by green.

- 1 T. N. Drebuschak, Y. A. Chesalov and E. V. Boldyreva, *Acta Crystallogr. Sect. B Struct. Sci.*, 2009, **65**, 770–781.
- 2 T. N. Drebuschak, N. V. Chukanov and E. V. Boldyreva, *Acta Crystallogr. Sect. E Struct. Reports Online*, 2006, **62**, o4393–o4395.
- 3 T. N. Drebuschak, N. V. Chukanov and E. V. Boldyreva, *Acta Crystallogr. Sect. C Cryst. Struct. Commun.*, 2007, **63**, o355–o357.
- 4 T. N. Drebuschak, N. V. Chukanov and E. V. Boldyreva, *Acta Crystallogr. Sect. C Cryst. Struct. Commun.*, 2008, **64**, o623–o625.
- 5 Y. V. Seryotkin, T. N. Drebuschak and E. V. Boldyreva, *Acta Crystallogr. Sect. B Struct. Sci. Cryst. Eng. Mater.*, 2013, **69**, 77–85.
- 6 T. N. Drebuschak, V. A. Drebuschak and E. V. Boldyreva, *Acta Crystallogr. Sect. B Struct. Sci.*, 2011, **67**, 163–176.
